# Supplementary material
Source: PubMed Central journal article supplement (PMC1134961)
Supplement: bj3870333add.pdf [file bj3870333add.pdf]

**Supplementary Table 1** NMR chemical shifts of the Vpr-(52–96) protein in 30% C<sup>2</sup>H<sub>3</sub>CN/70% water at 303 K, pH 3, calibrated to water  
 Chemical shifts at 2 mM concentration might not be exactly the same as those observed in heteronuclear experiments. This is due to a slight difference in acetonitrile concentration.

| Residues | <sup>15</sup> N | NH   | αH         | βH         | Others                                                                    |
|----------|-----------------|------|------------|------------|---------------------------------------------------------------------------|
| D52      |                 | 7.81 | 4.31       | 2.89, 2.94 |                                                                           |
| T53      | 114.18          | 8.33 | 4.16       | 3.93       | γCH <sub>3</sub> 0.97                                                     |
| W54      |                 | 7.93 | 4.47       | 3.22       | 2H 7.21; 4H 7.45; 5H 6.94; 6H 7.09;<br>7H 7.36; NH 9.97                   |
| T55      | 114.38          | 7.98 | 4.05       | 4.15       | γCH <sub>3</sub> 1.2                                                      |
| G56      |                 | 7.9  | 3.84       |            |                                                                           |
| V57      | 121.22          | 7.86 | 3.7        | 2.19       | γCH <sub>3</sub> 0.98                                                     |
| E58      |                 | 8.08 | 3.92       | 2.03, 2.14 | γCH <sub>2</sub> 2.48, 2.4                                                |
| A59      | 120.64          | 7.91 | 4.03       | 1.46       |                                                                           |
| L60      |                 | 7.75 | 4.06       | 1.81       | γCH <sub>2</sub> 1.71; δCH <sub>3</sub> 0.86                              |
| I61      | 119.25          | 8.17 | 3.52       | 1.92       | γCH <sub>2</sub> 1.05, 1.79; γCH <sub>3</sub> 0.89; δCH <sub>3</sub> 0.81 |
| R62      |                 | 7.71 | 4.06       | 1.91       | γCH <sub>2</sub> 1.61; δCH <sub>2</sub> 3.14; NH 7.15                     |
| I63      | 119.84          | 7.92 | 3.78       | 2.01       | γCH <sub>2</sub> 1.19, 1.78; γCH <sub>3</sub> 1.69; δCH <sub>3</sub> 0.85 |
| L64      | 120.11          | 8.37 | 4          | 1.9        | γH 1.46                                                                   |
| Q65      |                 | 8.56 | 3.87       | 1.98       | γCH <sub>2</sub> 2.26, 2.53; δNH <sub>2</sub> 6.9, 6.5                    |
| Q66      |                 | 7.95 | 4.1        | 2.18, 2.27 | γCH <sub>2</sub> 2.39, 2.52; δNH <sub>2</sub> 7.08, 6.56                  |
| L67      | 119.02          | 8.27 | 4.09       | 2.01       | δCH <sub>3</sub> 0.91                                                     |
| L68      | 119.25          | 8.22 | 4          | 1.85       | γH 1.6; δCH <sub>3</sub> 0.93                                             |
| F69      | 118.49          | 8.18 | 4.34       | 3.24, 3.29 | 2.6H 7.25; 3.5H 7.3                                                       |
| I70      |                 | 8.21 | 3.69       | 1.96       | γCH <sub>2</sub> 1.28, 1.78; γCH <sub>3</sub> 0.86; δCH <sub>3</sub> 0.88 |
| H71      | 117.29          | 8.08 | 4.18       | 2.83, 2.95 | 4H 6.31; 2H 8.42                                                          |
| F72      | 117.08          | 8.1  | 4.32       | 3.17       | 2.6H 7.25; 3.5H 7.3                                                       |
| R73      |                 | 7.94 | 4.02       | 1.69, 1.73 | γCH <sub>2</sub> 1.48; δCH <sub>2</sub> 3.27; NH 7.09                     |
| I74      |                 | 7.83 | 3.96       | 1.82       | γCH <sub>2</sub> 1.16; γCH <sub>3</sub> 0.85; δCH <sub>3</sub> 0.79       |
| G75      | 110.09          | 7.99 | 3.88, 3.81 |            |                                                                           |
| C76      |                 | 7.79 | 4.37       | 2.82       |                                                                           |

|     |        |      |      |            |                                                                                                              |
|-----|--------|------|------|------------|--------------------------------------------------------------------------------------------------------------|
| R77 |        | 8.01 | 4.19 | 1.53, 1.6  | $\gamma\text{CH}_2$ 1.7, 1.77; $\delta\text{CH}_2$ 3.12; NH 7.13                                             |
| H78 |        | 8.23 | 4.66 | 3.12, 3.25 | 4H 7.28; 2H 8.58                                                                                             |
| S79 |        | 8.08 | 4.39 | 3.78, 3.83 |                                                                                                              |
| R80 |        | 8.27 | 4.32 | 1.62 1.73  | $\gamma\text{CH}_2$ 1.84; $\delta\text{CH}_2$ 3.14; NH 7.15                                                  |
| I81 |        | 7.9  | 4.1  | 1.82       | $\gamma\text{CH}_2$ 1.17; $\gamma\text{CH}_3$ 0.89; $\delta\text{CH}_3$ 0.84                                 |
| G82 | 111.68 | 8.14 | 3.84 | 3.92       |                                                                                                              |
| I83 |        | 7.72 | 4.1  | 1.82       | $\gamma\text{CH}_2$ 1.14, 1.43; $\gamma\text{CH}_3$ 0.88; $\delta\text{CH}_3$ 0.82                           |
| I84 |        | 7.91 | 4.05 |            | $\gamma\text{CH}_2$ 1.15; $\gamma\text{CH}_3$ 0.93; $\delta\text{CH}_3$ 0.86                                 |
| Q85 |        | 8.17 | 4.23 | 2.31       | $\gamma\text{CH}_2$ 2.03; $\delta\text{NH}_2$ 6.68, 7.32                                                     |
| Q86 |        | 8.17 | 4.23 | 2.31       | $\gamma\text{CH}_2$ 2.03; $\delta\text{NH}_2$ 6.77, 7.41                                                     |
| R87 |        | 8.16 | 4.23 | 1.73, 1.81 | $\gamma\text{CH}_2$ 1.61; $\delta\text{CH}_2$ 3.15; NH 7.11                                                  |
| R88 |        | 7.93 | 4.35 | 1.73; 1.84 | $\gamma\text{CH}_2$ 1.6; $\delta\text{CH}_2$ 3.13; NH 7.13                                                   |
| T89 | 114.34 | 7.94 | 4.31 | 4.17       | $\gamma\text{CH}_3$ 1.17                                                                                     |
| R90 |        | 8.2  | 4.3  | 1.73, 1.84 | $\gamma\text{CH}_2$ 1.6; $\delta\text{CH}_2$ 3.15; NH 7.12                                                   |
| N91 |        | 8.28 | 4.63 | 2.72, 2.78 |                                                                                                              |
| G92 |        | 8.19 | 3.88 |            |                                                                                                              |
| A93 | 122.92 | 7.99 | 4.32 | 1.37       |                                                                                                              |
| S94 |        | 8.04 | 4.39 | 3.81       |                                                                                                              |
| K95 | 122.56 | 8.12 | 4.38 | 1.65, 1.42 | $\gamma\text{CH}_2$ 1.74; $\delta\text{CH}_2$ 1.87; $\epsilon\text{CH}_2$ 2.95;<br>$\epsilon\text{NH}_3$ 7.4 |
| S96 |        | 8.08 | 3.88 | 3.81       |                                                                                                              |
